# Supplementary material for: Sublimation of frozen CsCl solutions in ESEM: determining the number and size of salt particles relevant to sea-salt aerosols
Source: Copernicus journal article supplement (doi:10.5194/tc-2021-376), 2022-03-11
Supplement: Supplementary file 1 [file tc-2021-376-supplement.pdf]

Sublimating frozen CsCl solutions in ESEM: the number and size of salt particles are influenced by the ice sublimation temperature, salt concentration and freezing method

Ľubica Vetráková<sup>1</sup> et al.

Correspondence to: Ľubica Vetráková (vetrakova@isibrno.cz) and Dominik Heger (hegerd@chemi.muni.cz)

Text S1. Calculating the particle density

The shape of the droplet was approximated by a spherical cap with a base diameter of 4 mm and a height of 1 mm. The maximum drop height was measured using an electron microscope, as a difference in the working distance between the plane of focus of the drop-top and the surface of the silicon pad (wafer). The droplet's base and volume were calculated to be 12.6 mm<sup>2</sup> and 6.81 mm<sup>3</sup>, respectively.

The surface densities are estimated based on the image analyses of the micrographs via the Mountains® software (Digital Surf). A few representative spots were analyzed for each salinity except for 0.5M CsCl; that calculation is not provided, as no small salt particles were detected in the highly concentrated sample.

Average volume densities of the salt particles (a number of particles generated from 1 mm<sup>3</sup> of the original frozen sample after the ice sublimation) were calculated via multiplying the average surface densities by the area of the base (12.6 mm<sup>2</sup>), and subsequently dividing this total number of salt particles in a sample by the volume of the droplet (6.81 mm<sup>3</sup>).

|                                                            |         | 0.005 M CsCl,<br>non-seeded | 0.005 M CsCl,<br>seeded | 0.05 M CsCl,<br>non-seeded | 0.05 M CsCl,<br>seeded |
|------------------------------------------------------------|---------|-----------------------------|-------------------------|----------------------------|------------------------|
| Surface density<br>of salt particles<br>/ mm <sup>-2</sup> | Spot #1 | 5550                        | 7730                    | 56900                      | 62800                  |
|                                                            | Spot #2 | 1260                        | 12000                   | 21500                      | 59500                  |
|                                                            | Spot #3 |                             | 22900                   |                            | 43800                  |
|                                                            | Spot #4 |                             | 8400                    |                            | 72400                  |
|                                                            | Spot #5 |                             | 8640                    |                            |                        |
|                                                            | Mean    | 3405 ± 3033                 | 11934 ± 6350            | 39200 ± 25032              | 59625 ± 11885          |

|                                                           |  |             |               |               |                |
|-----------------------------------------------------------|--|-------------|---------------|---------------|----------------|
| Volume density<br>of salt particles<br>/ mm <sup>-3</sup> |  | 6300 ± 5613 | 22081 ± 11748 | 72528 ± 46314 | 110319 ± 21989 |
|-----------------------------------------------------------|--|-------------|---------------|---------------|----------------|

**Table S1. The calculated surface density (mm<sup>-2</sup>) and volume density (mm<sup>-3</sup>) with sample standard deviation under different conditions.**

## Supplementary figures

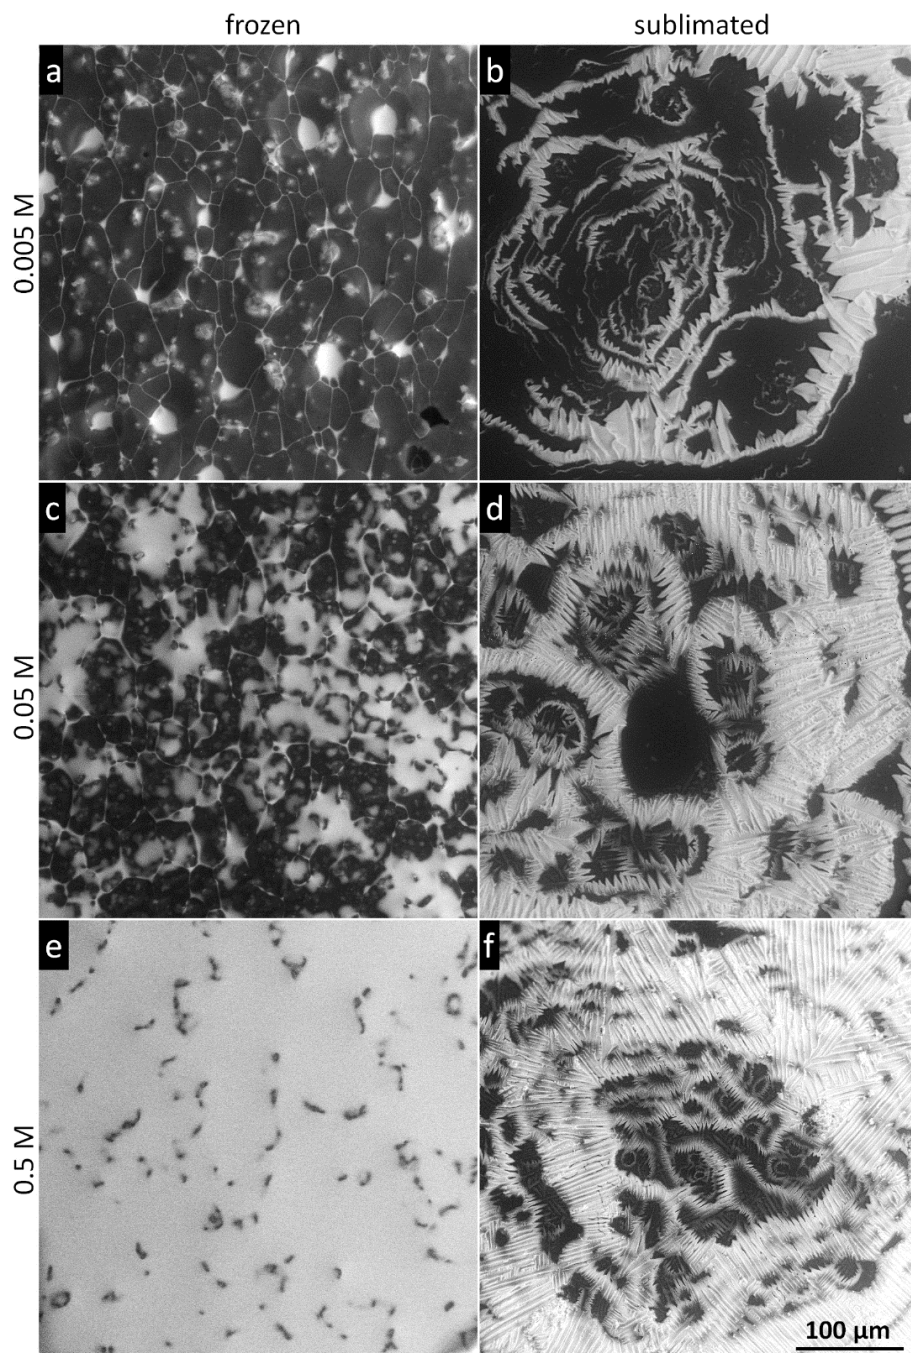

**Figure S1:** The structure of the frozen samples (before the sublimation) and the CsCl salt residua after the sublimation of the 0.005, 0.05, and 0.5 M non-seeded frozen samples at  $-20\text{ }^{\circ}\text{C}$ , i.e., above the  $T_{\text{en}}$ . In the frozen samples (panels a, c, and e), the white and dark areas represent liquid brine and the ice, respectively. In the sublimated samples (panels b, d, and f), the white and dark areas represent crystallized CsCl salt and the silicon pad, respectively.

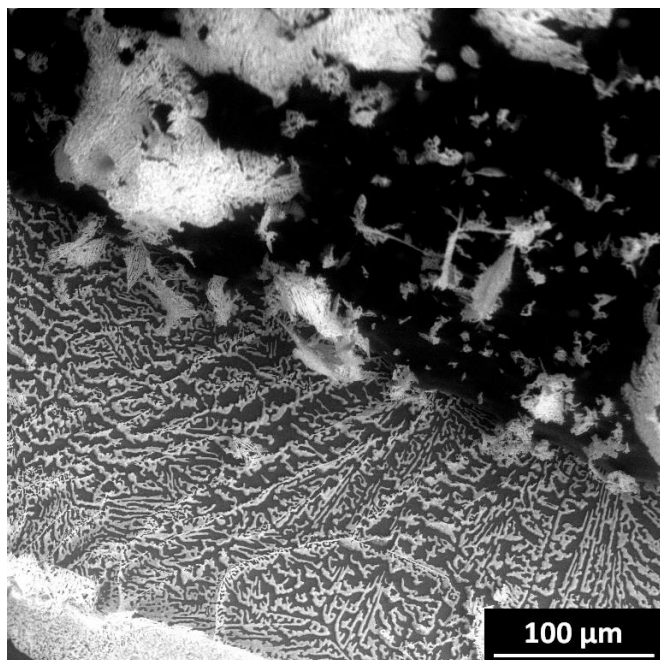

Figure S2: Partially sublimated 0.05 M seeded sample. Prior to sublimation, the frozen sample was cooled down to  $-25^{\circ}\text{C}$ , then heated up to  $-20^{\circ}\text{C}$ , then cooled down to  $-25^{\circ}\text{C}$  again. When heated to  $-20^{\circ}\text{C}$ , the brine at the surface became liquid and leaked to the edge of the sample where it solidified after further cooling. Left-down corner displays a broader salt rim of the drop caused by the liquefaction of the brine above its  $T_{\text{eu}}$ .

35

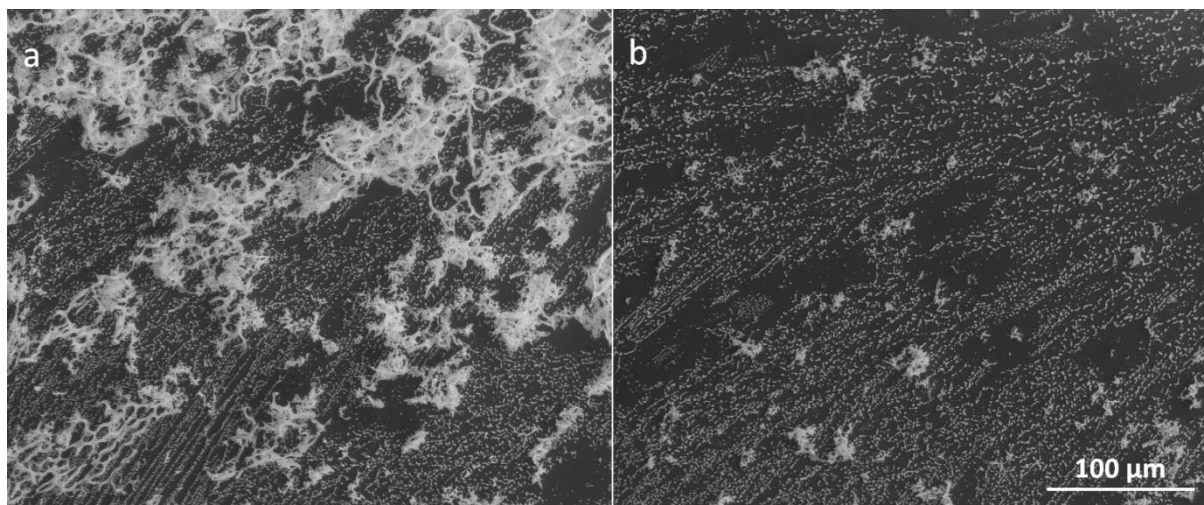

Figure S3: The salt residues in 0.05 M non-seeded sample just after the sublimation process at  $-25^{\circ}\text{C}$  (a) and after venting the chamber, blowing the sample with air gun, and evacuation procedure (b). A same spot is imaged in both panels. The scale in panel b is valid for both the images.

40
